# Supplementary material
Source: HighWire-hosted journal article supplement (https://bmjopen.bmj.com/content/14/11/e083922)
Supplement: inline-supplementary-material-1 [file inline-supplementary-material-1.pdf]

**Population level trends over a decade in geographical inequality for opportunity in access to maternal care services: findings from the National Family Health Surveys in India**

**Supplementary file**

Correspondence to: Prof. Rakhi Dandona; [rakhi.dandona@phfi.org](mailto:rakhi.dandona@phfi.org)

Supplementary Table 1. Number of districts by state in the National Family Health Survey (NFHS) rounds 4 and 5.

|                              | Number of districts |        |
|------------------------------|---------------------|--------|
|                              | NFHS-4              | NFHS-5 |
| India                        | 628                 | 695    |
| Less developed               | 363                 | 395    |
| Arunachal Pradesh            | 16                  | 20     |
| Assam                        | 27                  | 33     |
| Bihar                        | 38                  | 38     |
| Chhattisgarh                 | 18                  | 27     |
| Jharkhand                    | 24                  | 24     |
| Madhya Pradesh               | 50                  | 51     |
| Manipur                      | 9                   | 9      |
| Meghalaya                    | 7                   | 11     |
| Mizoram                      | 8                   | 8      |
| Nagaland                     | 11                  | 11     |
| Odisha                       | 30                  | 30     |
| Rajasthan                    | 33                  | 33     |
| Sikkim                       | 4                   | 4      |
| Tripura                      | 4                   | 8      |
| Uttar Pradesh                | 71                  | 75     |
| Uttarakhand                  | 13                  | 13     |
| More developed               | 265                 | 300    |
| Andhra Pradesh               | 13                  | 13     |
| Delhi                        | 9                   | 11     |
| Goa                          | 2                   | 2      |
| Gujarat                      | 26                  | 33     |
| Haryana                      | 21                  | 22     |
| Himachal Pradesh             | 12                  | 12     |
| Jammu & Kashmir <sup>§</sup> | 22                  | 22     |
| Karnataka                    | 30                  | 30     |
| Kerala                       | 14                  | 14     |
| Maharashtra                  | 35                  | 36     |
| Punjab                       | 20                  | 22     |
| Tamil Nadu                   | 32                  | 32     |
| Telangana                    | 10                  | 31     |
| West Bengal                  | 19                  | 20     |

Supplementary Table 2. Coverage of four of more antenatal care (ANC) visits, institutional delivery with skilled birth attendant (SBA), and post-natal care within 48 hours of delivery, and continuum of care for the most recent livebirth in the last 5 years in the National Family Health Survey (NFHS) 4 and NFHS 5 for India and its states. CI denotes confidence interval.

| State             | Sample size          |            | Four of more ANC visits |                        |                                               | Institutional delivery with SBA* |                        |                                               | Post-natal care within 48 hours of delivery |                        |                                               | Continuum of care      |                        |                                               |
|-------------------|----------------------|------------|-------------------------|------------------------|-----------------------------------------------|----------------------------------|------------------------|-----------------------------------------------|---------------------------------------------|------------------------|-----------------------------------------------|------------------------|------------------------|-----------------------------------------------|
|                   | NFHS-4 (N)           | NFHS-5 (N) | NFHS-4 % of N (95% CI)  | NFHS-5 % of N (95% CI) | Percent change from NFHS-4 to NFHS-5 (95% CI) | NFHS-4 % of N (95% CI)           | NFHS-5 % of N (95% CI) | Percent change from NFHS-4 to NFHS-5 (95% CI) | NFHS-4 % of N (95% CI)                      | NFHS-5 % of N (95% CI) | Percent change from NFHS-4 to NFHS-5 (95% CI) | NFHS-4 % of N (95% CI) | NFHS-5 % of N (95% CI) | Percent change from NFHS-4 to NFHS-5 (95% CI) |
| India             | 188,506 <sup>†</sup> | 174,796    | 46.4 (46.2-46.7)        | 57.0 (56.8-57.3)       | 22.8 (22.1-23.5)                              | 75.5 (75.3-75.7)                 | 85.0 (84.9-85.2)       | 12.6 (12.2-12.9)                              | 61.4 (61.2 - 61.6)                          | 78.9 (78.7-79.1)       | 28.5 (28.0-29.0)                              | 32.9 (32.7-33.1)       | 45.6 (45.4-45.9)       | 38.6 (37.6-39.6)                              |
| Less developed    | 132,809              | 113,519    | 36.0 (35.7-36.3)        | 48.0 (47.7-48.3)       | 33.3 (32.3-34.3)                              | 70.6 (70.3-70.8)                 | 80.9 (80.7-81.2)       | 14.6 (14.1-15.1)                              | 57.0 (56.7-57.2)                            | 75.1 (74.8-75.3)       | 31.8 (31.1-32.4)                              | 24.8 (24.6- 25.1)      | 36.5 (36.3-36.8)       | 47.2 (45.7-48.6)                              |
| Arunachal Pradesh | 3,858                | 4,570      | 24.6 (23.3- 26.0)       | 37.2 (35.8-38.6)       | 51.2 (45.1-57.4)                              | 52.7 (51.1-54.2)                 | 80.6 (79.4-81.7)       | 52.9 (49.8-56.1)                              | 27.5 (26.1-28.9)                            | 55.4 (53.9-56.8)       | 101.5 (95.7-107.2)                            | 11.8 (10.8- 12.8)      | 25.3 (24.1-26.6)       | 114.7 (104.4-124.4)                           |
| Assam             | 8,534                | 9,247      | 45.4 (44.3- 46.4)       | 50.9 (49.8-51.9)       | 12.1 (9.5-14.7)                               | 72.5 (71.5-73.4)                 | 84.8 (84.1-85.5)       | 17.0 (15.6-18.4)                              | 56.9 (55.8-57.9)                            | 67.8 (66.8-68.7)       | 19.1 (17.1-21.2)                              | 29.9 (20.9-30.9)       | 35.5 (34.5-36.5)       | 18.7 (15.1-22.4)                              |
| Bihar             | 16,822               | 13,874     | 14.6 (14.1 -15.2)       | 25.5 (24.7-26.2)       | 74.7 (70.0-79.3)                              | 66.0 (65.3-66.7)                 | 75.1 (74.4-75.8)       | 13.8 (12.5-15.0)                              | 47.8 (47.1-48.6)                            | 65.4 (64.6-66.2)       | 36.8 (35.0-38.7)                              | 9.0 (8.6- 9.4)         | 17.8 (17.2-18.4)       | 97.8 (91.5-104.1)                             |
| Chhattisgarh      | 6,805                | 6,526      | 56.9 (55.7 - 58.0)      | 61.2 (60.0-62.4)       | 7.6 (5.3-9.9)                                 | 71.8 (70.7-72.8)                 | 82.1 (81.2-83.0)       | 14.3 (12.7-16.0)                              | 67.2 (66.0-68.3)                            | 87.2 (86.3-87.9)       | 29.8 (28.0-31.5)                              | 37.6 (36.4-38.7)       | 47.3 (46.1-48.5)       | 25.8 (22.4-29.2)                              |
| Jharkhand         | 8,947                | 7,465      | 29.9 (29.0 - 30.9)      | 38.6 (37.5-39.7)       | 29.1 (25.4-32.8)                              | 63.8 (62.8-64.8)                 | 74.5 (73.5-75.5)       | 16.8 (15.0-18.5)                              | 46.8 (45.8-47.8)                            | 74.0 (73.0-75.0)       | 58.1 (55.6-60.6)                              | 17.0 (16.2-17.8)       | 27.0 (26.0-28.0)       | 58.8 (53.3-64.4)                              |
| Madhya Pradesh    | 17,406               | 11,700     | 34.9 (34.1-35.6)        | 57.0 (56.1-57.9)       | 63.3 (60.9-65.7)                              | 75.9 (75.2-76.5)                 | 86.6 (86.0-87.2)       | 14.1 (13.2-15.0)                              | 55.9 (55.1-56.6)                            | 85.1 (84.4-85.7)       | 52.2 (50.8-53.7)                              | 23.1 (22.4 -23.7)      | 46.1 (45.2-47.0)       | 99.6 (96.2-102.9)                             |
| Manipur           | 4,429                | 2,511      | 65.1 (63.7-66.5)        | 68.7 (66.8-70.4)       | 5.5 (2.9-8.2)                                 | 67.9 (66.5-69.3)                 | 70.9 (69.1-72.6)       | 4.4 (1.9-6.9)                                 | 62.8 (61.4-64.2)                            | 64.9 (62.9-66.7)       | 3.3 (0.5-6.2)                                 | 49.2 (47.7 -50.7)      | 50.9 (48.9-52.8)       | 3.5 (-0.3-7.2)                                |
| Meghalaya         | 3,119                | 4,602      | 50.1 (48.4-51.9)        | 50.3 (48.8-51.7)       | 0.4 (-3.5-4.3)                                | 56.0 (54.3-57.8)                 | 58.6 (57.2-60.0)       | 4.6 (1.2-8.1)                                 | 58.0 (56.3-59.8)                            | 58.3 (56.8-59.7)       | 0.5 (-2.8-3.8)                                | 32.1 (30.4 -33.7)      | 23.9 (22.7-25.1)       | -25.5 (-31.1 to -20.0)                        |
| Mizoram           | 3,681                | 1,896      | 56.4 (54.8-58.0)        | 52.4 (50.2-54.7)       | -7.1 (-10.6 to - 3.6)                         | 78.1 (76.7-79.4)                 | 79.3 (77.4-81.0)       | 1.5 (-0.5- 3.6)                               | 62.8 (61.2-64.3)                            | 68.1 (65.9-70.1)       | 8.4 (5.4-11.5)                                | 41.5 (39.9 -43.1)      | 42.1 (39.9-44.4)       | 1.4 (-3.3-6.2)                                |
| Nagaland          | 3,136                | 2,205      | 13.5 (12.3-14.7)        | 15.6 (14.1-17.2)       | 15.6 (5.2-25.9)                               | 33.8 (32.2-35.5)                 | 42.5 (40.5-44.6)       | 25.7 (20.0-31.4)                              | 22.6 (21.2-24.1)                            | 43.2 (41.2-45.3)       | 91.2 (83.3-99.0)                              | 7.6 (6.7- 8.6)         | 9.4 (8.3-10.7)         | 23.7 (9.3-38.1)                               |
| Odisha            | 9,015                | 7,141      | 64.7 (63.7-65.7)        | 80.0 (79.1-80.9)       | 23.6 (22.0-25.3)                              | 83.3 (82.5-84.0)                 | 90.1 (89.4-90.7)       | 8.1 (7.1-9.2)                                 | 77.4 (76.5-78.3)                            | 92.1 (91.5-92.7)       | 19.0 (17.8-20.2)                              | 47.8 (46.8 -48.8)      | 69.4 (68.4-70.5)       | 45.2 (42.8-47.6)                              |
| Rajasthan         | 11,950               | 10,831     | 38.3 (37.5-39.2)        | 56.5 (55.6-57.5)       | 47.5 (44.9-50.1)                              | 85.0 (84.4-85.6)                 | 95.0 (94.5-95.4)       | 11.8 (11.0-12.6)                              | 65.2 (64.3-66.0)                            | 85.2 (84.5-85.9)       | 30.7 (28.3-32.1)                              | 29.1 (28.2 -29.9)      | 49.4 (48.5-50.4)       | 69.8 (66.5-73.0)                              |
| Sikkim            | 899                  | 569        | 74.9 (71.9-77.6)        | 65.4 (61.4-69.2)       | -12.7 (-17.0 to - 8.3)                        | 95.2 (93.6-96.4)                 | 96.3 (94.4-97.5)       | 1.2 (-0.5-2.8)                                | 75.0 (72.0-77.7)                            | 73.5 (69.7-76.9)       | -2.1 (-6.3-2.3)                               | 56.0 (52.7-59.2)       | 52.0 (47.9-56.1)       | -7.1 (-13.7 to -0.6)                          |
| Tripura           | 1,169                | 1,860      | 63.5 (60.7-66.2)        | 54.0 (51.7-56.2)       | -15.0 (-19.7 to - 10.3)                       | 80.3 (77.9-82.5)                 | 86.8 (85.2-88.3)       | 8.1 (5.1-11.1)                                | 61.2 (58.4-64.0)                            | 68.6 (66.4-70.7)       | 12.1 (7.2-17.0)                               | 45.9 (43.0 -48.7)      | 39.7 (37.5-42.0)       | -13.5 (-20.2 to -6.8)                         |
| Uttar Pradesh     | 28,741               | 25,556     | 27.4 (26.9-27.9)        | 41.5 (40.9-42.1)       | 51.5 (49.3-53.7)                              | 68.1 (67.5-68.6)                 | 81.1 (80.6-81.5)       | 19.1 (18.2-20.0)                              | 59.1 (58.6 - 59.7)                          | 76.9 (76.4-77.4)       | 30.1 (29.1-31.2)                              | 20.0 (19.5 -20.4)      | 31.1 (30.5-31.7)       | 55.5 (52.8-58.2)                              |
| Uttarakhand       | 4,298                | 2,966      | 29.7 (28.3-31.1)        | 60.6 (58.8-62.3)       | 104.0 (98.7- 109.4)                           | 67.9 (66.5-69.2)                 | 80.1 (78.6-81.5)       | 18.0 (15.7-20.3)                              | 56.9 (55.4-58.4)                            | 84.2 (82.8-85.4)       | 48.0 (45.2-50.8)                              | 20.5 (19.3 -21.7)      | 47.7 (45.9-49.5)       | 132.7 (125.5-139.9)                           |
| More developed    | 55,697               | 61,277     | 71.3 (70.9-71.7)        | 73.7 (73.4-74.1)       | 3.4 (2.6-4.1)                                 | 87.2 (86.9-87.5)                 | 92.6 (92.4-92.8)       | 6.2 (5.8-6.6)                                 | 71.9 (71.5-72.3)                            | 86.0 (85.7-86.3)       | 19.6 (19.0-20.3)                              | 52.3 (51.9- 52.7)      | 62.5 (62.2-62.9)       | 19.5 (18.4-20.6)                              |
| Andhra Pradesh    | 4,055                | 2,092      | 75.7 (73.9 - 77.4)      | 69.3 (67.2-71.2)       | -8.5 (-11.0 to - 5.9)                         | 89.5 (88.2-90.7)                 | 95.7 (94.8-96.5)       | 6.9 (5.5-8.4)                                 | 79.3 (77.6 – 80.9)                          | 90.8 (89.5-91.9)       | 14.5 (12.3-16.7)                              | 57.8 (55.7– 59.8)      | 62.2 (60.1-64.3)       | 7.6 (3.8-11.5)                                |
| Delhi             | 1,258                | 2,379      | 71.4                    | 79.9                   | 11.9                                          | 88.0                             | 91.7                   | 4.2                                           | 63.3                                        | 87.2                   | 37.8                                          | 46.6                   | 69.6                   | 49.4                                          |

| State                        | Sample size   |               | Four of more ANC visits      |                              |                                                              | Institutional delivery with SBA* |                              |                                                            | Post-natal care within 48 hours of delivery |                              |                                                            | Continuum of care            |                              |                                                     |
|------------------------------|---------------|---------------|------------------------------|------------------------------|--------------------------------------------------------------|----------------------------------|------------------------------|------------------------------------------------------------|---------------------------------------------|------------------------------|------------------------------------------------------------|------------------------------|------------------------------|-----------------------------------------------------|
|                              | NFHS-4<br>(N) | NFHS-5<br>(N) | NFHS-4<br>% of N<br>(95% CI) | NFHS-5<br>% of N<br>(95% CI) | Percent<br>change<br>from<br>NFHS-4 to<br>NFHS-5<br>(95% CI) | NFHS-4<br>% of N<br>(95% CI)     | NFHS-5<br>% of N<br>(95% CI) | Percent<br>change<br>from NFHS-<br>4 to NFHS-5<br>(95% CI) | NFHS-4<br>% of N<br>(95% CI)                | NFHS-5<br>% of N<br>(95% CI) | Percent<br>change<br>from NFHS-<br>4 to NFHS-5<br>(95% CI) | NFHS-4<br>% of N<br>(95% CI) | NFHS-5<br>% of N<br>(95% CI) | Percent change<br>from NFHS-4 to<br>NFHS-5 (95% CI) |
|                              |               |               | (68.8 - 73.8)                | (78.2-81.4)                  | (8.3-15.6)                                                   | (86.1-89.7)                      | (90.5-92.7)                  | (2.1-6.3)                                                  | (60.6 - 66.0)                               | (85.8-88.5)                  | (33.3-42.1)                                                | (43.9 - 49.4)                | (67.7-71.4)                  | (43.2-55.5)                                         |
| Goa                          | 347           | 322           | 87.6<br>(83.7 - 90.7)        | 93.2<br>(89.8-95.4)          | 6.4<br>(2.2-10.5)                                            | 96.8<br>(94.4-98.2)              | 98.8<br>(96.7-99.5)          | 2.1<br>(0.1-4.0)                                           | 91.4<br>(87.9 - 93.9)                       | 96.3<br>(93.5-97.9)          | 5.4<br>(2.0-8.7)                                           | 80.7<br>(76.2 - 84.5)        | 90.1<br>(86.3-92.9)          | 11.6<br>(6.3-17.0)                                  |
| Gujarat                      | 5,827         | 7,575         | 66.4<br>(65.2 - 67.6)        | 77.7<br>(76.7-78.6)          | 17.0<br>(15.1-19.0)                                          | 83.9<br>(82.9-84.8)              | 90.3<br>(89.6-90.9)          | 7.6<br>(6.4-8.8)                                           | 62.9<br>(61.7 - 64.2)                       | 89.4<br>(88.6-90.0)          | 42.1<br>(40.1-44.2)                                        | 42.3<br>(41.0- 43.5)         | 66.3<br>(65.3-67.4)          | 56.7<br>(53.5-60.0)                                 |
| Haryana                      | 5,719         | 5,162         | 45.4<br>(44.1 - 46.7)        | 60.8<br>(59.4-62.1)          | 33.9<br>(30.7-37.1)                                          | 82.1<br>(81.1-83.1)              | 93.4<br>(92.6-94.0)          | 13.8<br>(12.5-15.0)                                        | 68.3<br>(67.0 - 69.5)                       | 91.3<br>(90.5-92.0)          | 33.7<br>(31.8-35.5)                                        | 34.3<br>(33.1 - 35.6)        | 55.6<br>(54.3-57.0)          | 62.1<br>(58.0-66.2)                                 |
| Himachal Pradesh             | 2,292         | 2,145         | 66.2<br>(64.3 - 68.1)        | 71.8<br>(69.8-73.6)          | 8.5<br>(5.3-11.7)                                            | 75.9<br>(74.1-77.6)              | 84.3<br>(82.7-85.8)          | 11.1<br>(8.6-13.6)                                         | 73.6<br>(71.8 - 75.4)                       | 88.9<br>(87.5-90.2)          | 20.8<br>(18.2-23.4)                                        | 49.5<br>(47.4 - 51.5)        | 59.3<br>(57.2-.61.3)         | 19.8<br>(15.2-24.4)                                 |
| Jammu & Kashmir <sup>‡</sup> | 6,280         | 5,367         | 79.5<br>(78.5 - 80.5)        | 80.7<br>(79.6-81.7)          | 1.5<br>(0.1-2.9)                                             | 83.2<br>(82.2-84.1)              | 91.0<br>(90.2-91.7)          | 9.4<br>(8.2-10.6)                                          | 73.0<br>(71.9 - 74.1)                       | 80.3<br>(79.2-81.3)          | 10.0<br>(8.4-11.6)                                         | 61.8<br>(60.6 - 63.0)        | 65.1<br>(63.8-66.4)          | 5.3<br>(3.2-7.5)                                    |
| Karnataka                    | 5,876         | 6,389         | 73.5<br>(72.3 - 74.6)        | 70.8<br>(69.6-71.9)          | -3.7<br>(-5.4 to -<br>2.0)                                   | 90.7<br>(90.0-91.5)              | 92.5<br>(91.8-93.1)          | 2.0<br>(1.1-2.9)                                           | 60.5<br>(59.2 - 61.7)                       | 86.4<br>(85.5-87.2)          | 42.8<br>(40.6-45.0)                                        | 44.6<br>(43.3 - 45.9)        | 59.1<br>(57.9-60.3)          | 32.5<br>(29.4-35.6)                                 |
| Kerala                       | 2,128         | 2,360         | 90.3<br>(89.0 - 91.5)        | 82.2<br>(80.6-83.7)          | -9.0<br>(-10.6 to -<br>7.4)                                  | 99.9<br>(99.6-100.0)             | 99.8<br>(99.5-99.9)          | -0.1<br>(-0.3-0.1)                                         | 86.3<br>(84.7 - 87.7)                       | 92.8<br>(91.7-93.8)          | 7.5<br>(5.7-9.3)                                           | 78.4<br>(76.6 - 80.1)        | 77.9<br>(76.2-79.5)          | -0.6<br>(-3.1-1.8)                                  |
| Maharashtra                  | 7,143         | 7,415         | 72.3<br>(71.3 - 73.3)        | 71.3<br>(70.3-72.3)          | -1.4<br>(-3.0- 0.2)                                          | 86.7<br>(85.9-87.5)              | 91.0<br>(90.3-91.6)          | 5.0<br>(4.0-5.9)                                           | 76.9<br>(75.9 - 77.9)                       | 84.1<br>(83.3-84.9)          | 9.4<br>(8.0-10.7)                                          | 54.4<br>(53.2 - 55.5)        | 60.2<br>(59.1-61.3)          | 10.7<br>(8.3-13.0)                                  |
| Punjab                       | 4,132         | 4,520         | 68.2<br>(66.7 - 69.6)        | 58.3<br>(56.8-59.7)          | -14.5<br>(-16.8 to -<br>12.2)                                | 92.0<br>(91.2-92.8)              | 94.1<br>(93.4-94.7)          | 2.3<br>(1.3-3.2)                                           | 88.4<br>(87.4 - 89.3)                       | 87.1<br>(86.1-88.0)          | -1.5<br>(-2.7 to -0.3)                                     | 59.1<br>(57.6 - 60.6)        | 50.2<br>(48.7-51.6)          | -15.1<br>(-17.8 to -12.3)                           |
| Tamil Nadu                   | 6,181         | 5,228         | 80.7<br>(79.7 - 81.7)        | 91.6<br>(90.8-92.3)          | 13.5<br>(12.2-14.8)                                          | 98.8<br>(98.5-99.1)              | 99.5<br>(99.3-99.7)          | 0.7<br>(0.4-1.0)                                           | 72.4<br>(71.3 - 73.5)                       | 92.2<br>(91.4-92.9)          | 27.3<br>(25.7-29.0)                                        | 60.8<br>(59.6 - 62.0)        | 84.9<br>(84.0-85.9)          | 39.6<br>(37.5-41.8)                                 |
| Telangana                    | NA            | 5,429         | 73.1<br>(71.0 - 75.1)        | 69.7<br>(68.5-70.9)          | -4.7<br>(-7.6 to -<br>1.7)                                   | 87.2<br>(85.6-88.7)              | 91.4<br>(90.6-92.1)          | 4.8<br>(3.0-6.6)                                           | 81.7<br>(79.8 - 83.4)                       | 86.6<br>(85.7-87.5)          | 6.0<br>(3.7-8.2)                                           | 57.6<br>(55.3– 59.9)         | 56.9<br>(55.6-58.2)          | -1.2<br>(-5.3-2.9)                                  |
| West Bengal                  | 4,459         | 4,894         | 74.2<br>(72.9 - 75.5)        | 75.7<br>(74.4-76.9)          | 2.0<br>(0.1-3.9)                                             | 77.0<br>(75.8-78.2)              | 91.2<br>(90.4-91.9)          | 18.4<br>(16.8-20.1)                                        | 63.1<br>(61.7 - 64.5)                       | 68.2<br>(66.9-69.5)          | 8.1<br>(5.6-10.5)                                          | 47.4<br>(46.0 - 48.9)        | 52.0<br>(50.6-53.4)          | 9.7<br>(6.3-13.1)                                   |

\*Includes doctor, auxiliary nurse midwife, nurse, midwife, and lady health visitor

<sup>‡</sup>Data missing on 101 women for institutional delivery with SBA, PNC within 48 hours of delivery, and continuum of care in NFHS-4

<sup>§</sup>Ladakh is combined with Jammu & Kashmir in NFHS-5; NFHS 4 did not provide separate data for Ladakh

**Supplementary Table 3. Human Opportunity Index for geographic inequality for four of more antenatal care (ANC) visits, institutional delivery with skilled birth attendant (SBA), post-natal care within 48 hours of delivery and continuum of care for the most recent livebirth in the last 5 years in the National Family Health Survey (NFHS) rounds 4 and 5 for India and its states. CI denotes confidence interval.**

|                       | Human Opportunity Index |        |                                               |                                 |        |                                               |                                             |        |                                               |                   |        |                                               |
|-----------------------|-------------------------|--------|-----------------------------------------------|---------------------------------|--------|-----------------------------------------------|---------------------------------------------|--------|-----------------------------------------------|-------------------|--------|-----------------------------------------------|
|                       | Four of more ANC visits |        |                                               | Institutional delivery with SBA |        |                                               | Post-natal care within 48 hours of delivery |        |                                               | Continuum of care |        |                                               |
|                       | NFHS-4                  | NFHS-5 | Percent change from NFHS 4 to NFHS-5 (95% CI) | NFHS-4                          | NFHS-5 | Percent change from NFHS 4 to NFHS-5 (95% CI) | NFHS-4                                      | NFHS-5 | Percent change from NFHS 4 to NFHS-5 (95% CI) | NFHS-4            | NFHS-5 | Percent change from NFHS 4 to NFHS-5 (95% CI) |
| India                 | 35.8                    | 48.4   | 35.2 (34.5 to 35.9)                           | 68.9                            | 80.4   | 16.7 (16.4 to 17.0)                           | 54.6                                        | 73.5   | 34.6 (34.2 to 35.1)                           | 24.4              | 37.1   | 52.2 (51.1 to 53.0)                           |
| Less developed states | 27.9                    | 40.7   | 45.9 (44.9 to 46.9)                           | 64.5                            | 76.2   | 18.1 (17.7 to 18.6)                           | 50.6                                        | 69.4   | 37.2 (36.6 to 37.8)                           | 18.5              | 29.7   | 60.5 (59.2 to 61.9)                           |
| Arunachal Pradesh     | 20.2                    | 34.3   | 69.8 (62.7 to 76.9)                           | 47.0                            | 77.5   | 64.9 (61.3 to 68.5)                           | 22.7                                        | 51.9   | 128.6 (122.1 to 135.2)                        | 8.2               | 21.9   | 167.1 (154.4 to 179.8)                        |
| Assam                 | 40.7                    | 45.6   | 12.0 (9.2 to 14.9)                            | 66.5                            | 82.3   | 23.8 (22.1 to 25.4)                           | 51.1                                        | 64.7   | 26.6 (24.3 to 28.9)                           | 24.9              | 31.0   | 24.5 (20.3 to 28.7)                           |
| Bihar                 | 12.8                    | 22.9   | 78.9 (73.9 to 83.9)                           | 61.0                            | 72.1   | 18.2 (16.8 to 19.6)                           | 43.1                                        | 59.6   | 38.3 (36.2 to 40.3)                           | 7.7               | 15.3   | 98.7 (91.8 to 105.6)                          |
| Chhattisgarh          | 52.0                    | 57.2   | 10.0 (7.5 to 12.5)                            | 68.6                            | 78.5   | 14.4 (12.7 to 16.2)                           | 63.0                                        | 85.3   | 35.4 (33.5 to 37.3)                           | 33.1              | 43.3   | 30.8 (27.0 to 34.6)                           |
| Jharkhand             | 25.0                    | 36.0   | 44.0 (39.7 to 48.3)                           | 59.5                            | 70.4   | 18.3 (16.4 to 20.3)                           | 43.2                                        | 70.9   | 64.1 (61.4 to 66.8)                           | 13.8              | 24.1   | 74.6 (68.3 to 81.0)                           |
| Madhya Pradesh        | 29.4                    | 52.2   | 77.6 (74.8 to 80.3)                           | 70.8                            | 84.1   | 18.8 (17.7 to 19.8)                           | 51.3                                        | 82.8   | 61.4 (59.8 to 63.0)                           | 19.1              | 41.2   | 115.7 (111.9 to 119.5)                        |
| Manipur               | 54.9                    | 61.2   | 11.5 (8.2 to 14.8)                            | 58.0                            | 62.0   | 6.9 (3.8 to 10.0)                             | 54.4                                        | 57.7   | 6.1 (2.7 to 9.4)                              | 39.2              | 41.5   | 5.9 (1.3 to 10.4)                             |
| Meghalaya             | 44.3                    | 45.4   | 2.5 (-1.9 to 6.9)                             | 49.6                            | 52.5   | 5.8 (1.9 to 9.8)                              | 52.0                                        | 53.4   | 2.7 (-1.1 to 6.4)                             | 26.4              | 20.5   | -22.3 (-28.8 to -15.9)                        |
| Mizoram               | 52.4                    | 46.6   | -11.1 (-14.8 to -7.3)                         | 72.1                            | 72.4   | 0.4 (-2.0 to 2.9)                             | 59.0                                        | 63.9   | 8.3 (5.0 to 11.6)                             | 37.9              | 36.6   | -3.4 (-8.5 to 1.6)                            |
| Nagaland              | 8.3                     | 11.3   | 36.1 (22.3 to 50.0)                           | 26.2                            | 37.4   | 42.7 (35.8 to 49.7)                           | 17.2                                        | 37.5   | 118.0 (108.5 to 127.5)                        | 4.4               | 6.5    | 47.7 (28.0 to 67.5)                           |
| Odisha                | 59.2                    | 76.2   | 28.7 (26.8 to 30.6)                           | 79.2                            | 87.3   | 10.2 (9.1 to 11.4)                            | 74.4                                        | 90.7   | 21.9 (20.6 to 23.2)                           | 42.6              | 64.8   | 52.1 (49.4 to 54.8)                           |
| Rajasthan             | 33.0                    | 51.2   | 55.2 (52.2 to 58.1)                           | 81.8                            | 93.9   | 14.8 (13.9 to 15.7)                           | 61.2                                        | 82.6   | 35.0 (33.4 to 36.5)                           | 24.6              | 44.2   | 79.7 (76.0 to 83.3)                           |
| Sikkim                | 71.3                    | 60.1   | -15.7 (-20.5 to -10.9)                        | 94.4                            | 95.2   | 0.8 (-0.9 to 2.6)                             | 71.9                                        | 70.4   | -2.1 (-6.7 to 2.5)                            | 52.1              | 48.3   | -7.3 (-14.4 to -0.2)                          |
| Tripura               | 60.4                    | 50.4   | -16.6 (-21.6 to -11.5)                        | 76.4                            | 83.5   | 9.3 (5.9 to 12.7)                             | 58.2                                        | 64.2   | 10.3 (5.1 to 15.5)                            | 42.9              | 35.3   | -17.7 (-24.8 to -10.6)                        |
| Uttar Pradesh         | 21.9                    | 38.1   | 74.0 (71.4 to 76.6)                           | 64.0                            | 78.0   | 21.9 (20.9 to 22.8)                           | 53.5                                        | 73.2   | 36.8 (35.6 to 38.0)                           | 15.6              | 27.9   | 78.8 (75.6 to 82.1)                           |
| Uttarakhand           | 25.9                    | 55.7   | 115.1 (109.0 to 121.1)                        | 65.2                            | 78.5   | 20.4 (18.0 to 22.8)                           | 54.3                                        | 81.5   | 50.1 (47.1 to 53.1)                           | 17.5              | 43.3   | 147.4 (139.3 to 155.5)                        |
| More developed states | 65.2                    | 68.2   | 4.6 (3.9 to 5.3)                              | 82.8                            | 90.1   | 8.8 (8.4 to 9.2)                              | 66.2                                        | 82.6   | 24.8 (24.1 to 25.4)                           | 45.7              | 56.3   | 23.2 (22.2 to 24.2)                           |
| Andhra Pradesh        | 74.3                    | 68.3   | -8.1 (-10.8 to -5.4)                          | 88.0                            | 95.4   | 8.4 (6.8 to 10.0)                             | 77.6                                        | 90.4   | 16.5 (14.2 to 18.8)                           | 56.1              | 59.3   | 5.7 (1.7 to 9.7)                              |
| Goa                   | 86.0                    | 92.4   | 7.4 (3.0 to 11.9)                             | 96.7                            | 98.5   | 1.9 (-0.2 to 3.9)                             | 90.5                                        | 95.6   | 5.6 (2.1 to 9.2)                              | 79.0              | 88.8   | 12.4 (6.7 to 18.1)                            |
| Gujarat               | 59.7                    | 73.1   | 22.4 (20.2 to 24.7)                           | 80.1                            | 87.5   | 9.2 (7.9 to 10.6)                             | 59.9                                        | 87.1   | 45.4 (43.2 to 47.6)                           | 36.7              | 61.2   | 66.8 (63.1 to 70.4)                           |
| Haryana               | 37.3                    | 56.6   | 51.7 (47.9 to 55.5)                           | 75.6                            | 90.5   | 19.7 (18.1 to 21.3)                           | 61.3                                        | 88.7   | 44.7 (42.5 to 46.9)                           | 27.2              | 51.2   | 88.2 (83.3 to 93.1)                           |
| Himachal Pradesh      | 61.7                    | 67.1   | 8.8 (5.2 to 12.3)                             | 72.7                            | 82.5   | 13.5 (10.8 to 16.2)                           | 69.8                                        | 87.3   | 25.1 (22.2 to 27.9)                           | 45.4              | 54.3   | 19.6 (14.6 to 24.6)                           |
| Jammu & Kashmir*      | 71.9                    | 76.3   | 6.1 (4.4 to 7.8)                              | 77.8                            | 87.9   | 13.0 (11.6 to 14.4)                           | 67.1                                        | 77.2   | 15.1 (13.2 to 16.9)                           | 53.3              | 59.5   | 11.6 (9.1 to 14.2)                            |
| Karnataka             | 69.3                    | 65.1   | -6.1(-7.9 to -4.2)                            | 88.4                            | 90.3   | 2.1 (1.1 to 3.1)                              | 55.3                                        | 83.6   | 51.2 (48.8 to 53.6)                           | 39.6              | 52.6   | 32.8 (29.4 to 36.3)                           |
| Kerala                | 88.9                    | 77.3   | -13.0 (-14.8 to -11.3)                        | 99.8                            | 99.7   | -0.1 (-0.3 to 0.1)                            | 84.2                                        | 91.5   | 8.7 (6.7 to 10.6)                             | 75.7              | 72.9   | -3.7 (-6.3 to -1.1)                           |
| Maharashtra           | 69.3                    | 66.7   | -3.8(-5.5 to -2.0)                            | 83.9                            | 88.2   | 5.1 (4.0 to 6.2)                              | 74.2                                        | 80.8   | 8.9 (7.4 to 10.4)                             | 50.0              | 54.5   | 9.0 (6.4 to 11.6)                             |
| Delhi                 | 68.8                    | 75.3   | 9.4 (5.5 to 13.3)                             | 86.0                            | 90.2   | 4.9 (2.6 to 7.2)                              | 59.1                                        | 85.1   | 44.0 (39.3 to 48.7)                           | 42.7              | 65.3   | 52.9 (46.2 to 59.7)                           |
| Punjab                | 64.6                    | 54.7   | -15.3 (-17.8 to -12.8)                        | 91.1                            | 92.9   | 2.0 (1.0 to 3.0)                              | 86.9                                        | 85.4   | -1.7 (-3.0 to -0.4)                           | 55.5              | 46.9   | -15.5 (-18.5 to -12.5)                        |
| Tamil Nadu            | 77.5                    | 89.6   | 15.6 (14.2 to 17.0)                           | 98.4                            | 99.2   | 0.8 (0.5 to 1.1)                              | 68.4                                        | 90.4   | 32.2 (30.4 to 33.9)                           | 56.4              | 82.0   | 45.4 (43.0 to 47.7)                           |
| Telangana             | 71.8                    | 68.2   | -5.0 (-8.0 to -2.0)                           | 85.6                            | 90.4   | 5.6 (3.7 to 7.6)                              | 79.9                                        | 85.4   | 6.9 (4.5 to 9.3)                              | 55.7              | 54.9   | -1.4 (-5.7 to 2.8)                            |
| West Bengal           | 69.4                    | 72.2   | 4.0 (1.9 to 6.2)                              | 71.3                            | 89.2   | 25.1 (23.2 to 27.1)                           | 58.0                                        | 63.8   | 10.7 (7.3 to 12.7)                            | 42.0              | 47.3   | 12.6 (8.8 to 16.4)                            |

\*Ladakh is combined with Jammu & Kashmir in NFHS-5; NFHS 4 did not provide separate data for Ladakh.

Supplementary Table 4. Ratio of Human opportunity index (HOI) between wealth index quintiles I and V for the maternal services for India and its states, National Family Health Survey-5.

|                       | Ratio of HOI between wealth index quintiles I and V |                                                     |                                             |                   |
|-----------------------|-----------------------------------------------------|-----------------------------------------------------|---------------------------------------------|-------------------|
|                       | Four of more antenatal care visits                  | Institutional delivery with skilled birth attendant | Post-natal care within 48 hours of delivery | Continuum of care |
| India                 | 0.52                                                | 0.69                                                | 0.73                                        | 0.38              |
| Less developed states | 0.55                                                | 0.69                                                | 0.74                                        | 0.41              |
| Arunachal Pradesh     | 0.43                                                | 0.58                                                | 0.70                                        | 0.38              |
| Assam                 | 0.63                                                | 0.75                                                | 0.79                                        | 0.52              |
| Bihar                 | 0.32                                                | 0.72                                                | 0.71                                        | 0.25              |
| Chhattisgarh          | 0.89                                                | 0.72                                                | 0.93                                        | 0.70              |
| Jharkhand             | 0.51                                                | 0.64                                                | 0.81                                        | 0.36              |
| Madhya Pradesh        | 0.72                                                | 0.83                                                | 0.91                                        | 0.60              |
| Manipur               | 0.40                                                | 0.40                                                | 0.48                                        | 0.30              |
| Meghalaya             | 0.66                                                | 0.47                                                | 0.88                                        | 0.50              |
| Mizoram               | 0.16                                                | 0.28                                                | 0.36                                        | 0.12              |
| Nagaland              | 0.27                                                | 0.35                                                | 0.47                                        | 0.06              |
| Odisha                | 0.84                                                | 0.81                                                | 0.94                                        | 0.69              |
| Rajasthan             | 0.77                                                | 0.92                                                | 0.92                                        | 0.73              |
| Sikkim                | 1.41                                                | 0.94                                                | 1.17                                        | 1.27              |
| Tripura               | 0.81                                                | 0.79                                                | 0.68                                        | 0.38              |
| Uttar Pradesh         | 0.60                                                | 0.76                                                | 0.80                                        | 0.44              |
| Uttarakhand           | 0.51                                                | 0.68                                                | 0.81                                        | 0.41              |
| More developed states | 0.83                                                | 0.80                                                | 0.76                                        | 0.63              |
| Andhra Pradesh        | 0.66                                                | 0.75                                                | 0.73                                        | 0.50              |
| Goa                   | 1.07                                                | 1.01                                                | 1.01                                        | 1.09              |
| Gujarat               | 0.79                                                | 0.83                                                | 0.96                                        | 0.71              |
| Haryana               | 0.52                                                | 0.67                                                | 0.70                                        | 0.39              |
| Himachal Pradesh      | 0.70                                                | 0.60                                                | 0.77                                        | 0.49              |
| Jammu and Kashmir     | 0.76                                                | 0.74                                                | 0.78                                        | 0.61              |
| Karnataka             | 0.75                                                | 0.90                                                | 0.91                                        | 0.64              |
| Kerala                | 0.95                                                | 1.00                                                | 0.89                                        | 0.95              |
| Maharashtra           | 0.68                                                | 0.73                                                | 0.78                                        | 0.51              |
| Delhi                 | 0.34                                                | 0.24                                                | 0.36                                        | 0.02              |
| Punjab                | 0.54                                                | 0.84                                                | 0.80                                        | 0.57              |
| Tamil Nadu            | 1.01                                                | 0.96                                                | 0.94                                        | 0.96              |
| Telangana             | 0.78                                                | 0.83                                                | 0.89                                        | 0.63              |
| West Bengal           | 0.85                                                | 0.90                                                | 0.70                                        | 0.57              |

Ratio of HOI

Less than 0.50

0.51-0.89

0.90-1.09

1.10-1.49

1.50 or more
